# Supplementary material
Source: publisher figshare collection journal article supplement (https://acs.figshare.com/ndownloader/files/3763363)
Supplement: Supplementary file 1 [file 3763363]

## Supporting Information

### Impact of Surface Polyethylene Glycol (PEG) Density on Biodegradable Nanoparticle Transport in Mucus *ex vivo* and Distribution *in vivo*

Qingguo Xu,<sup>▲,#</sup> Laura M. Ensign,<sup>▲,#,†</sup> Nicholas J. Boylan,<sup>#,†</sup> Arne Schön,<sup>▼</sup> Xiaoqun Gong,<sup>▲,#,►,+</sup> Jeh-Chang Yang,<sup>†</sup> Nicholas W. Lamb,<sup>▲,#</sup> Shutian Cai,<sup>†</sup> Tao Yu,<sup>‡,#</sup> Ernesto Freire,<sup>▼</sup> Justin Hanes<sup>▲,#,†,‡,◄,\*</sup>

<sup>▲</sup>Department of Ophthalmology, The Wilmer Eye Institute, The Johns Hopkins University School of Medicine, Baltimore, MD 21231, USA

<sup>#</sup>Center for Nanomedicine, The Johns Hopkins University School of Medicine, MD 21231, USA

<sup>†</sup>Department of Chemical and Biomolecular Engineering, The Johns Hopkins University, Baltimore, MD 21218, USA

<sup>►</sup>Institute of Nanobiotechnology, School of Materials Science and Engineering, Tianjin University, Tianjin 300072, PR China

<sup>+</sup>School of Life Science, Tianjin University, Tianjin 300072, PR China

<sup>▼</sup>Department of Biology, The Johns Hopkins University, Baltimore, MD 21218, USA

<sup>‡</sup>Department of Biomedical Engineering, The Johns Hopkins University, Baltimore, MD 21205, USA

<sup>◄</sup>Departments of Environmental Health Sciences, Oncology, Neurosurgery, and Pharmacology & Molecular Sciences, The Johns Hopkins University, Baltimore, MD 21231, USA

Table S1. Characteristics of PEG-containing block copolymers

| Block polymer                | PEG<br>(kDa) | LA:GA<br>[a] | PEG<br>content<br>[b] (%) | Mn <sup>[c]</sup><br>(kDa) | Mn <sup>[d]</sup><br>(kDa) | Mw <sup>[d]</sup><br>(kDa) | PDI <sup>[d]</sup> |
|------------------------------|--------------|--------------|---------------------------|----------------------------|----------------------------|----------------------------|--------------------|
| PLGA-PEG <sub>5k</sub> , 25% | 5            | 78:22        | 25.2                      | 19.9                       | 15.1                       | 21.9                       | 1.75               |
| PLGA-PEG <sub>5k</sub> , 20% | 5            | 49:51        | 21.4                      | 23.4                       | 25.4                       | 38.7                       | 1.52               |
| PLGA-PEG <sub>5k</sub> , 10% | 5            | 55:45        | 9.8                       | 50.8                       | 40.5                       | 71.0                       | 1.45               |

[a] The molar ratio of LA:GA was measured by comparing the <sup>1</sup>H NMR integral intensity at 5.22 ppm (-CH- on lactide), 1.59 ppm (-CH<sub>3</sub> on lactide) and 4.83 ppm (-CH<sub>2</sub>- on glycolide), as shown in Figure. S3.

[b] PEG content in the block copolymers were determined by <sup>1</sup>H NMR.

[c] PLGA-PEG molecular weight (Mn) was determined by <sup>1</sup>H NMR through comparing the integral at 5.22 ppm (-CH- in lactide), 1.59 ppm (-CH<sub>3</sub> on lactide), 4.83 ppm (-CH<sub>2</sub>- in glycolide) and 3.65 ppm (-CH<sub>2</sub>CH<sub>2</sub>- in PEG) and by taking into account of the known Mn of PEG. For PCL-PEG, integrals at 4.06 ppm (-O-CH<sub>2</sub>-) and 2.31 ppm (-CH<sub>2</sub>-CO-) were analyzed.

[d] Mn, Mw and polydispersity (PDI) were measured by GPC.

Table S2. Characteristics of PLGA-PEG<sub>5k</sub> nanoparticles prepared by nanoprecipitation method

| Target<br>PEG<br>content<br>(wt%) | ζ-<br>potential<br>(mV) | D (nm)  | Total PEG<br>content<br>(wt%) | Surface<br>PEG content<br>(wt%) | [Γ]<br>(chains/<br>100 nm <sup>2</sup> ) | [Γ]/[Γ*] |
|-----------------------------------|-------------------------|---------|-------------------------------|---------------------------------|------------------------------------------|----------|
| 10                                | -3.4±0.4                | 117±1.4 | 6.5±0.1                       | 5.8±0.2                         | 15.8±0.6                                 | 3.6±0.1  |

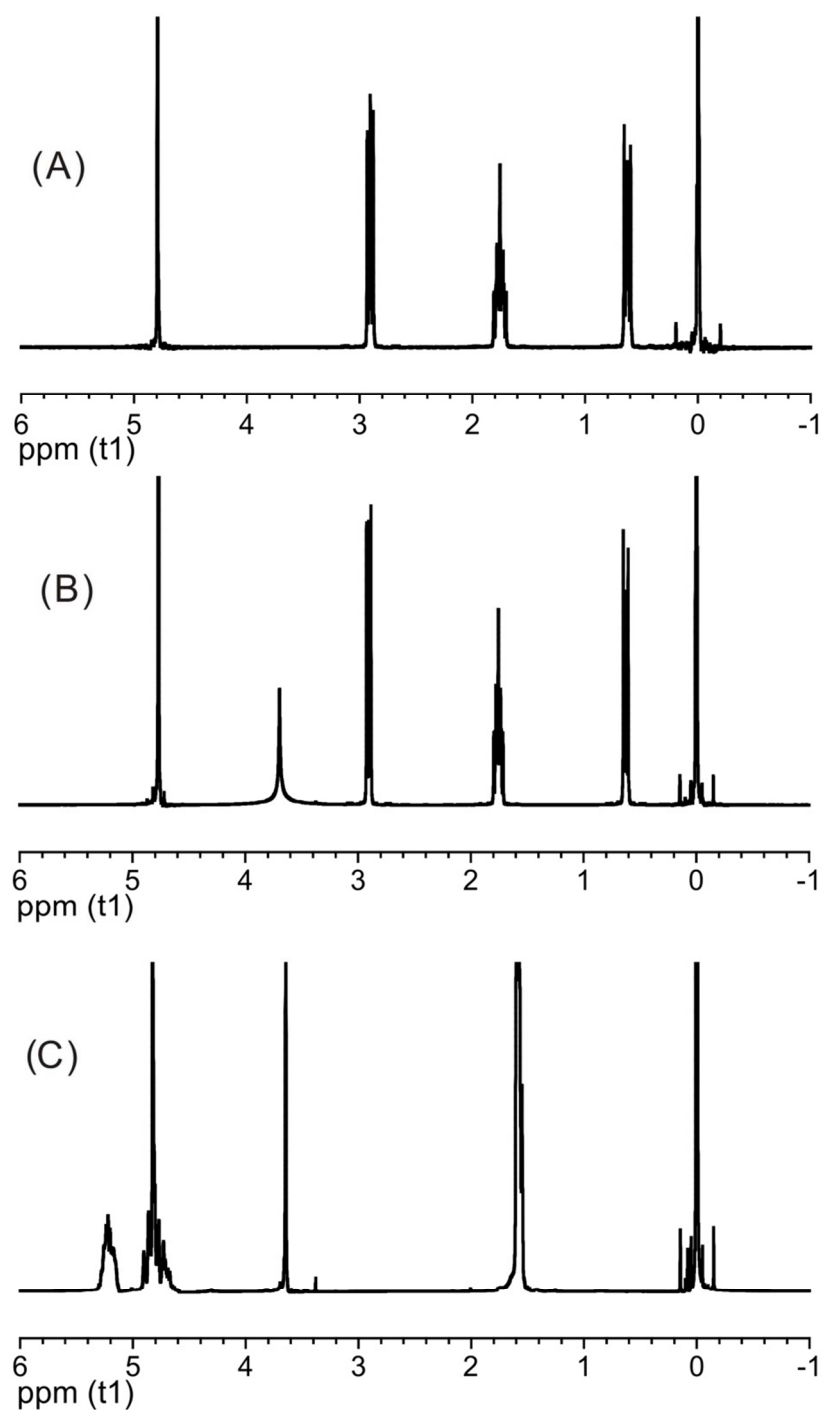

Figure S1. Representative  $^1\text{H}$  NMR spectra of (A) PLGA (0% PEG) nanoparticles and (B) PLGA-PEG<sub>10%</sub> nanoparticles suspended in  $\text{D}_2\text{O}$  with 1 wt% DSS as internal standard. Peaks at 2.91, 1.76, 0.65 and 0 ppm are from DSS. PEG on the nanoparticle surface shows broadened peak around 3.65 ppm, however, no peaks were observed from PLGA nanoparticles at 3.65 ppm. (C)  $^1\text{H}$  NMR spectra of lyophilized PLGA-PEG<sub>10%</sub> nanoparticles dissolved in  $\text{CDCl}_3$  with TMS as internal standard and PEG shows sharp peak around 3.65 ppm.

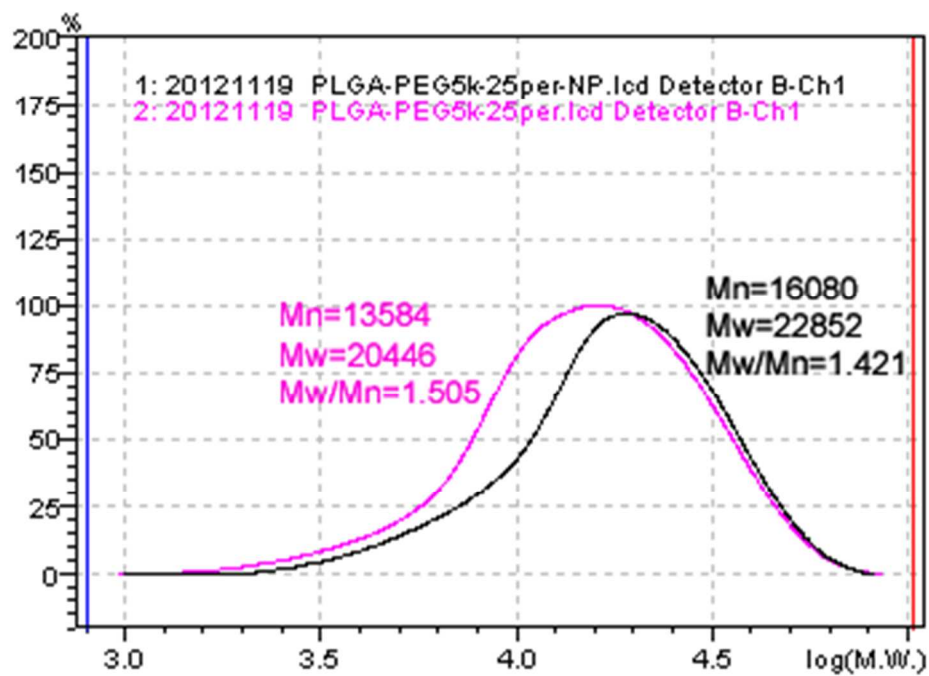

Figure S2. GPC results of PLGA-PEG<sub>5k</sub> (25 wt% PEG) raw materials (pink color) and the nanoparticles prepared from PLGA-PEG<sub>5k</sub> (25 wt% PEG) by the emulsification method (black color)

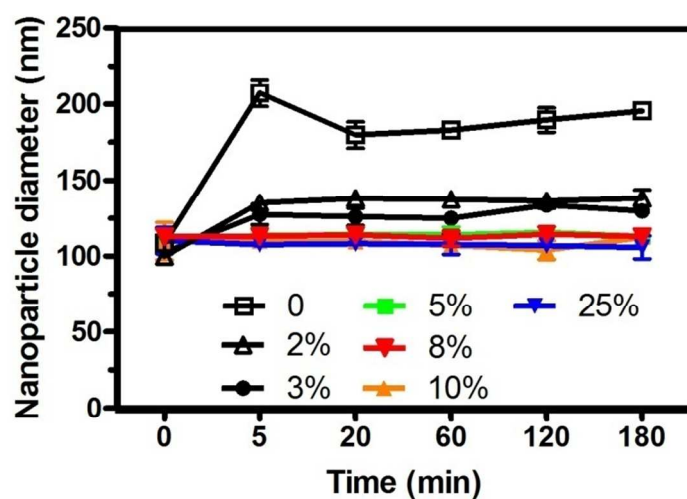

Figure S3. Nanoparticle stability over time *in vitro* in mucin solution. PLGA nanoparticles with different PEG content (0, 2%, 3%, 5%, 8%, 10% and 25% PEG) were incubated with 10 mg/ml mucin solution at 37°C under gentle stirring. At each time point, an aliquot of the nanoparticle suspension was removed to measure the hydrodynamic diameter using dynamic light scattering.

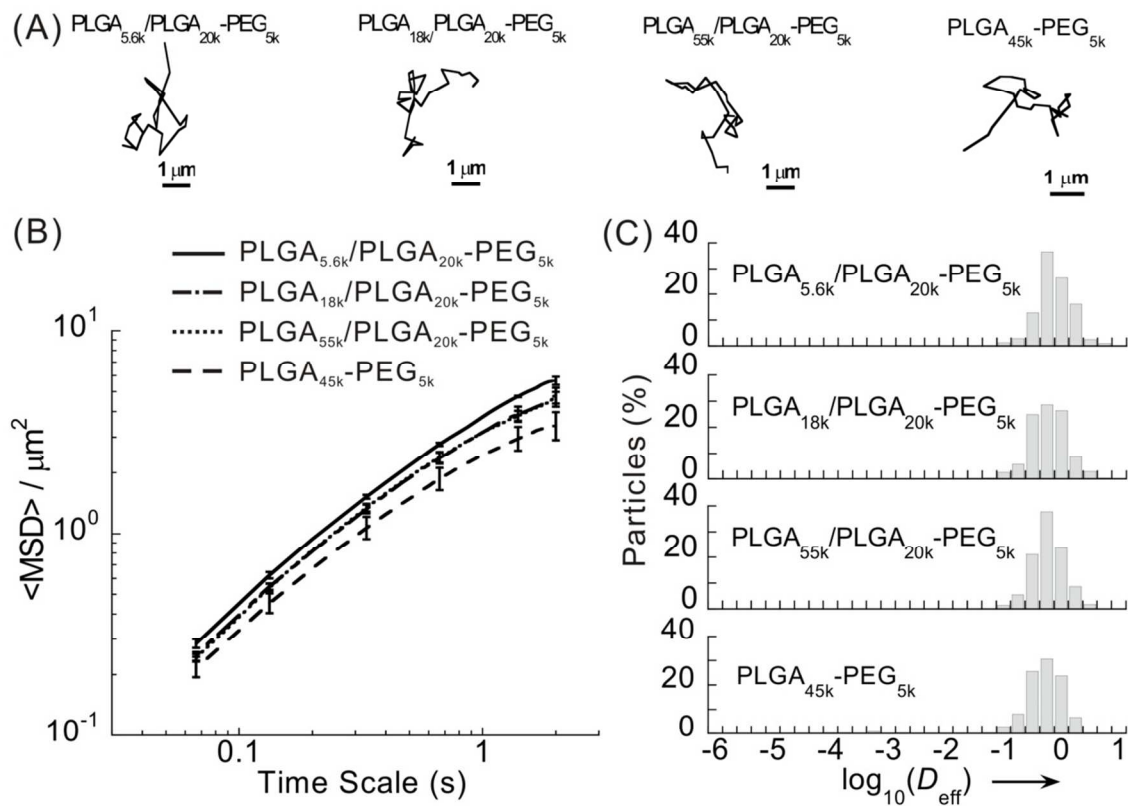

Figure S4. Transport of PTX-loaded PLGA-PEG and PLGA/PLGA-PEG blended nanoparticles in fresh, undiluted CVM. A) Representative trajectories for 3 s of particle motion. B) Ensemble-averaged geometric mean square displacement ( $\langle \text{MSD} \rangle$ ) as a function of time scale. C) Distributions of the logarithms of individual particle effective diffusivities ( $D_{\text{eff}}$ ) at a time scale of 1 s. Data represent three independent experiments with  $\geq 120$  nanoparticles tracked for each experiment (mean  $\pm$  SEM).

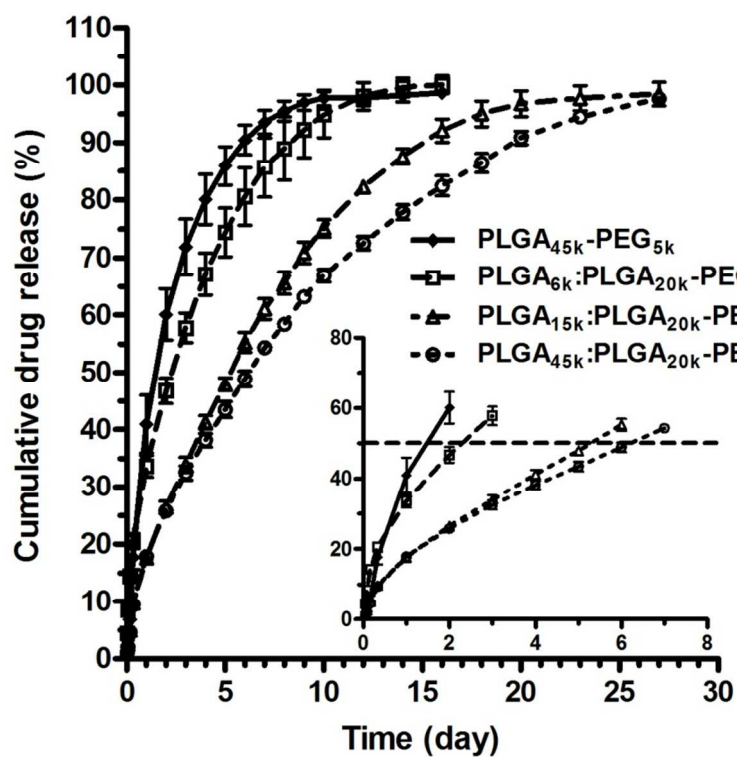

Figure S5. *In vitro* release of PTX from PLGA-PEG and PLGA/PLGA-PEG nanoparticles. The insert highlights the release profiles with extrapolated  $T_{1/2}$ , the time to release 50% of encapsulated drug.
